# Supplementary figures and images for: Computational Models Using Multiple Machine Learning Algorithms for Predicting Drug Hepatotoxicity with the DILIrank Dataset
Source: Preprints.org preprint supplement (doi:10.20944/preprints202002.0178.v1), 2020-02-14

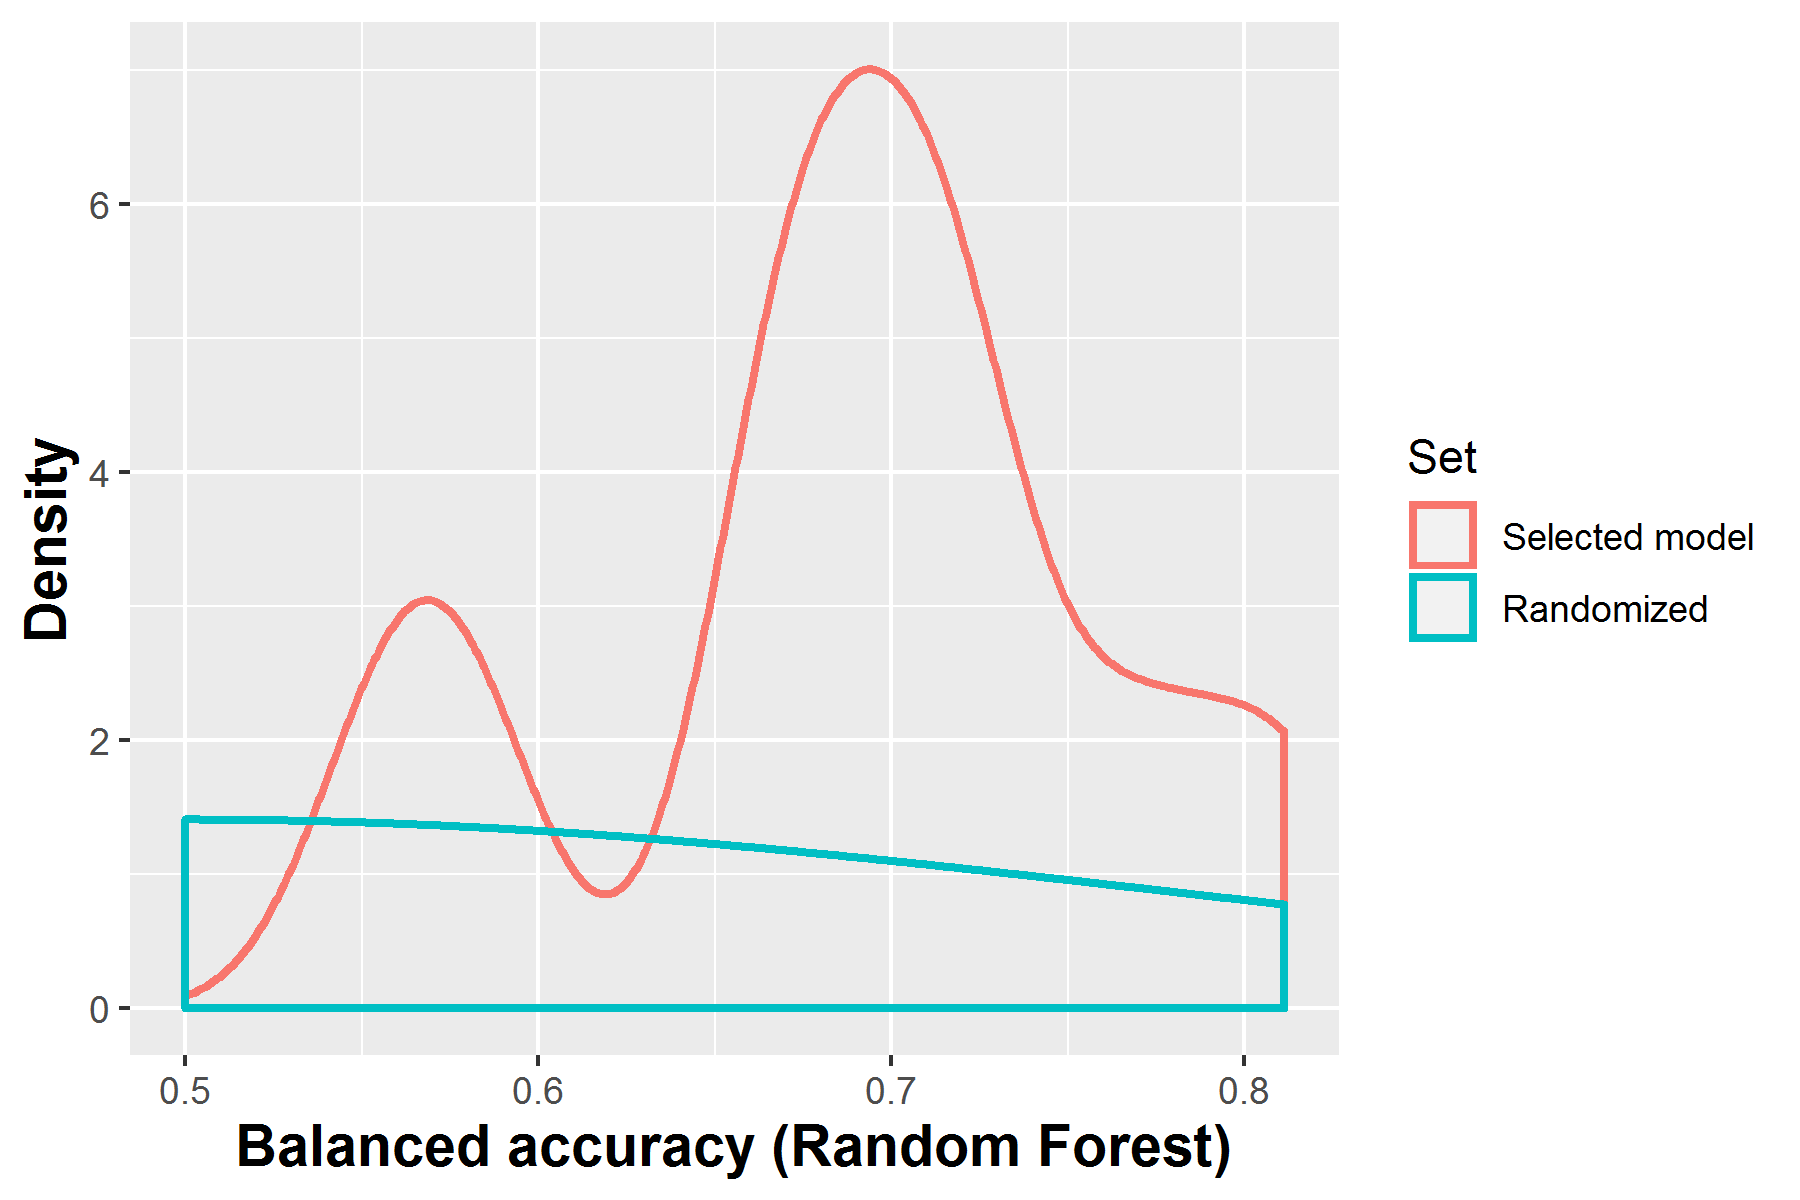

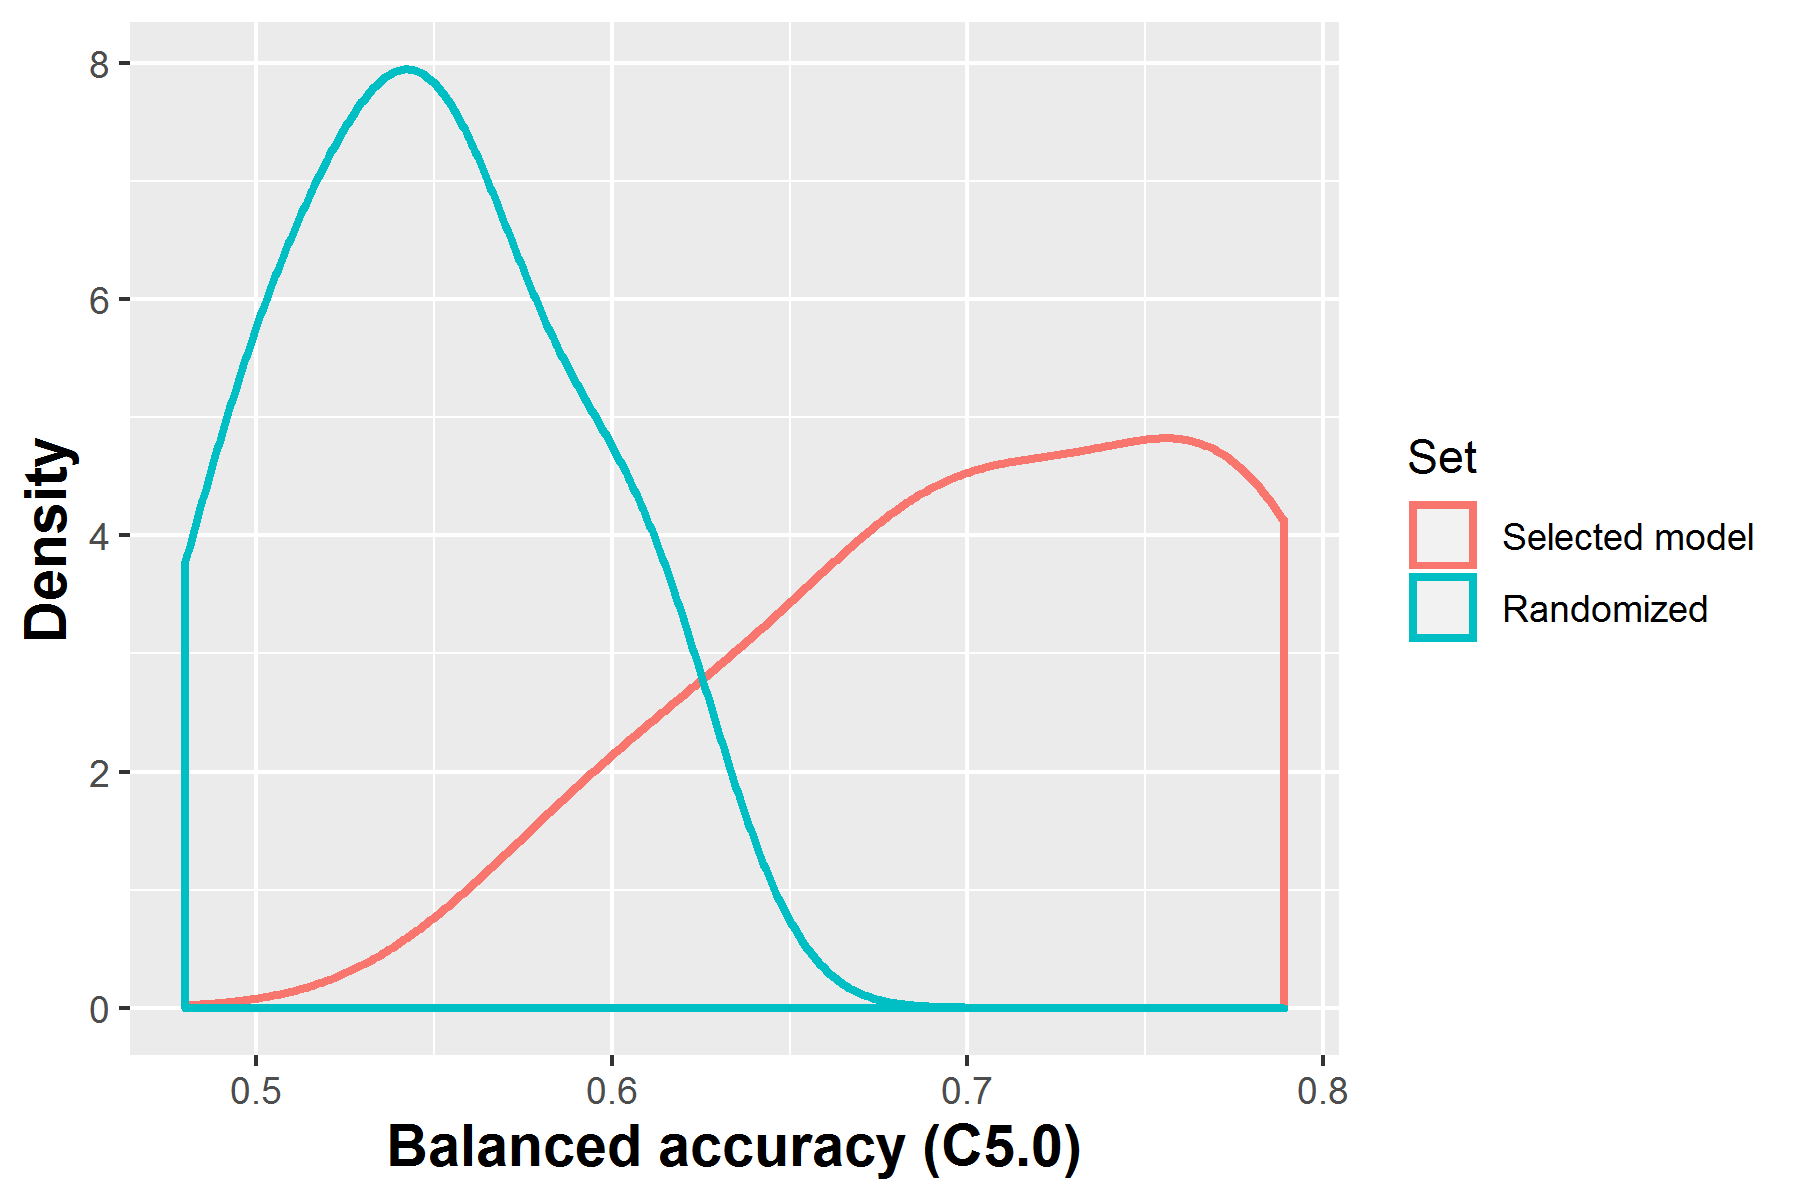

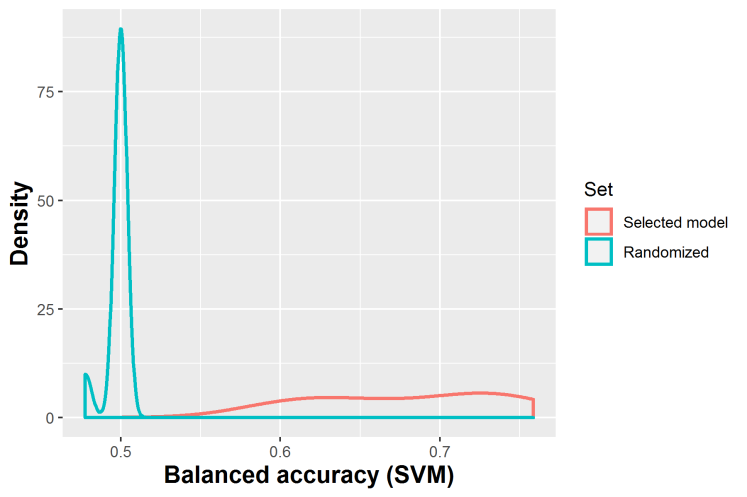

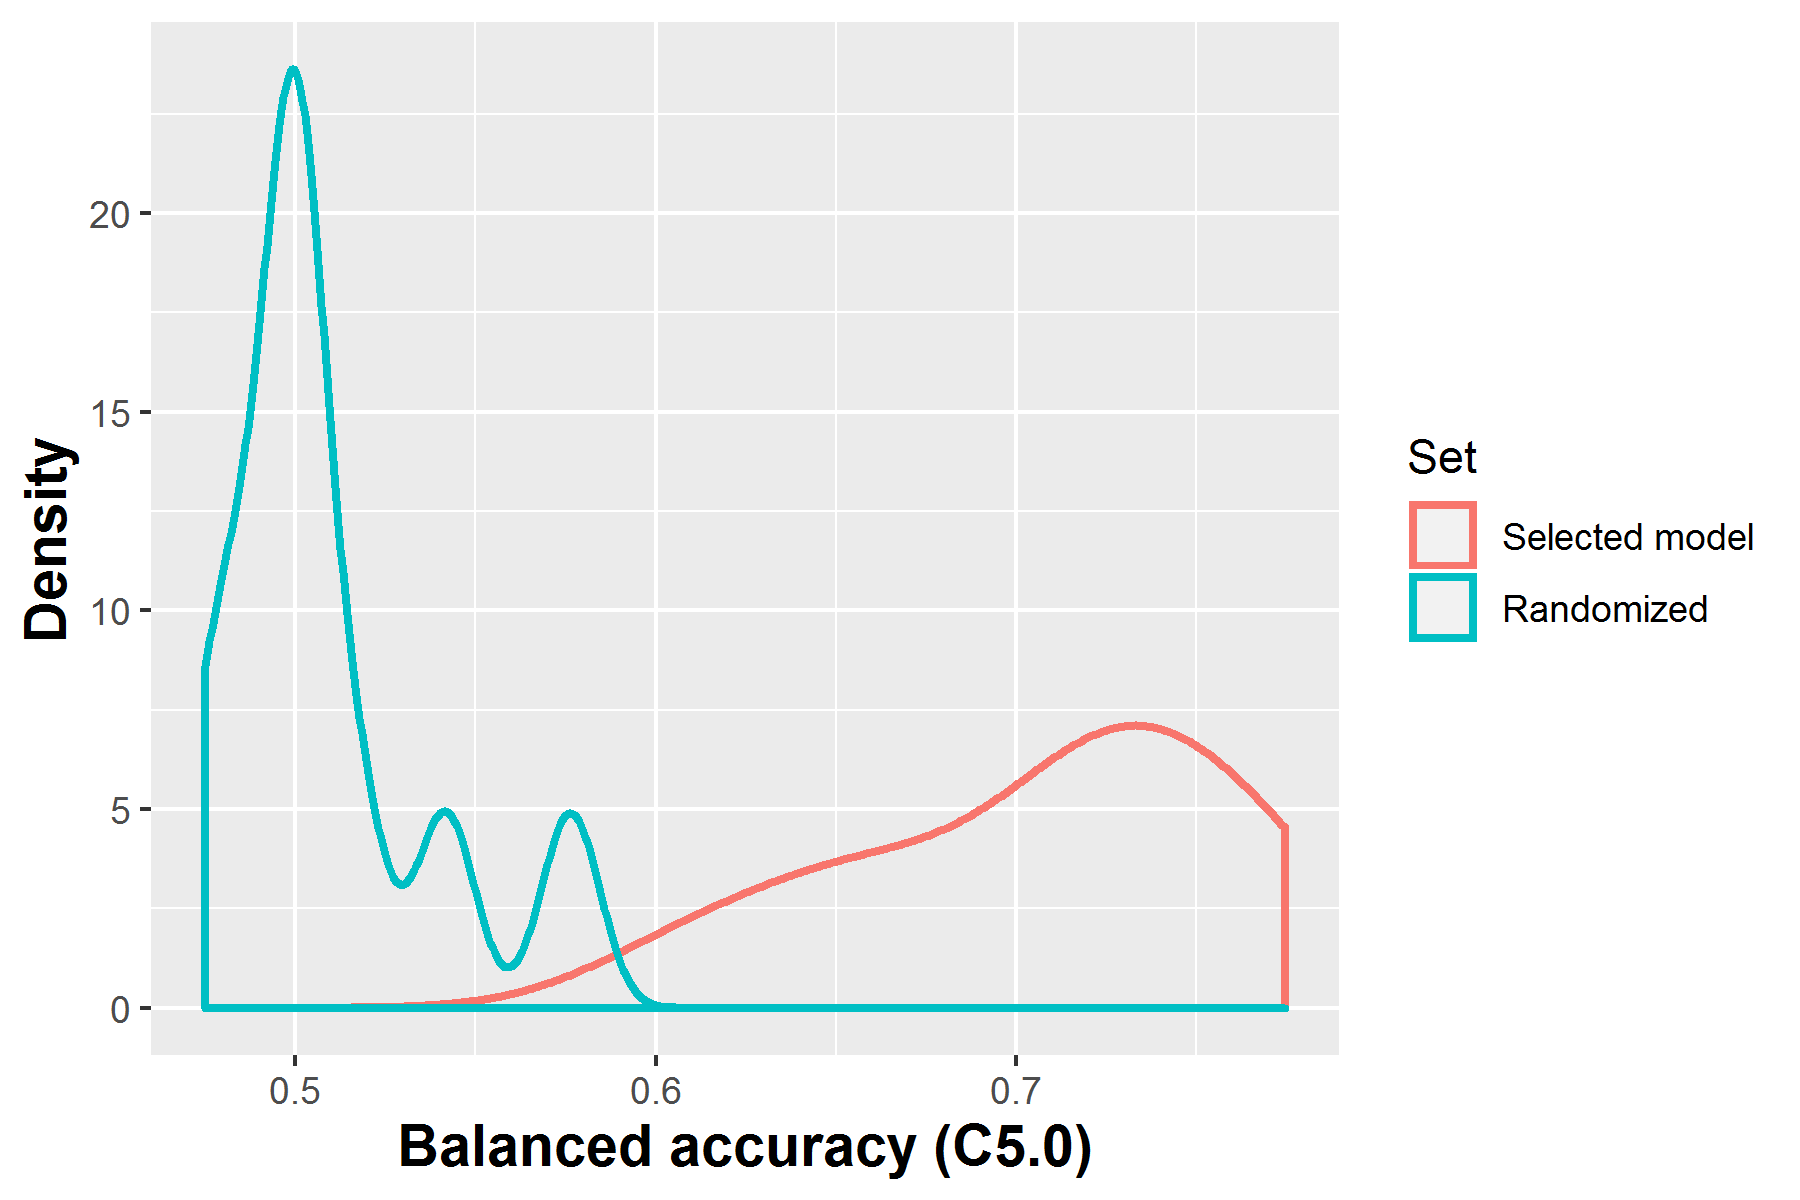

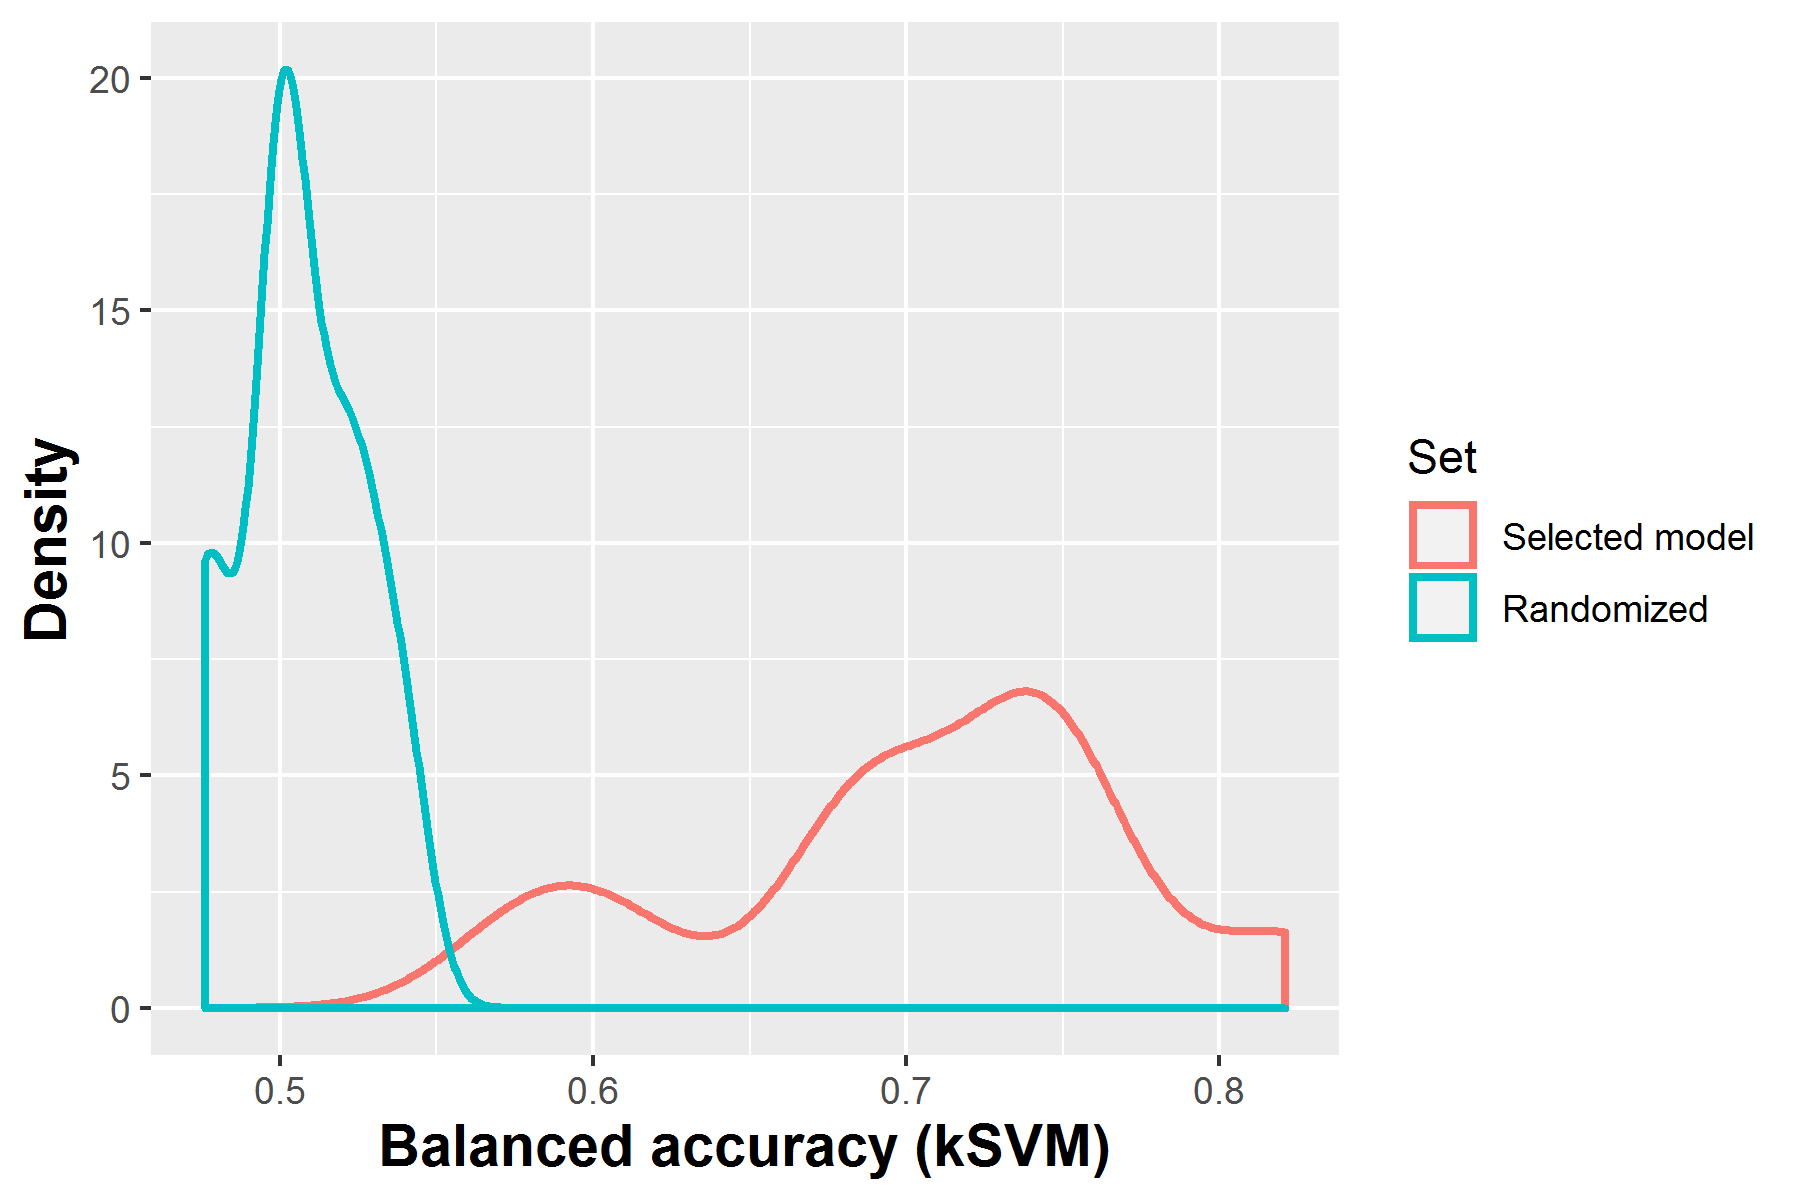

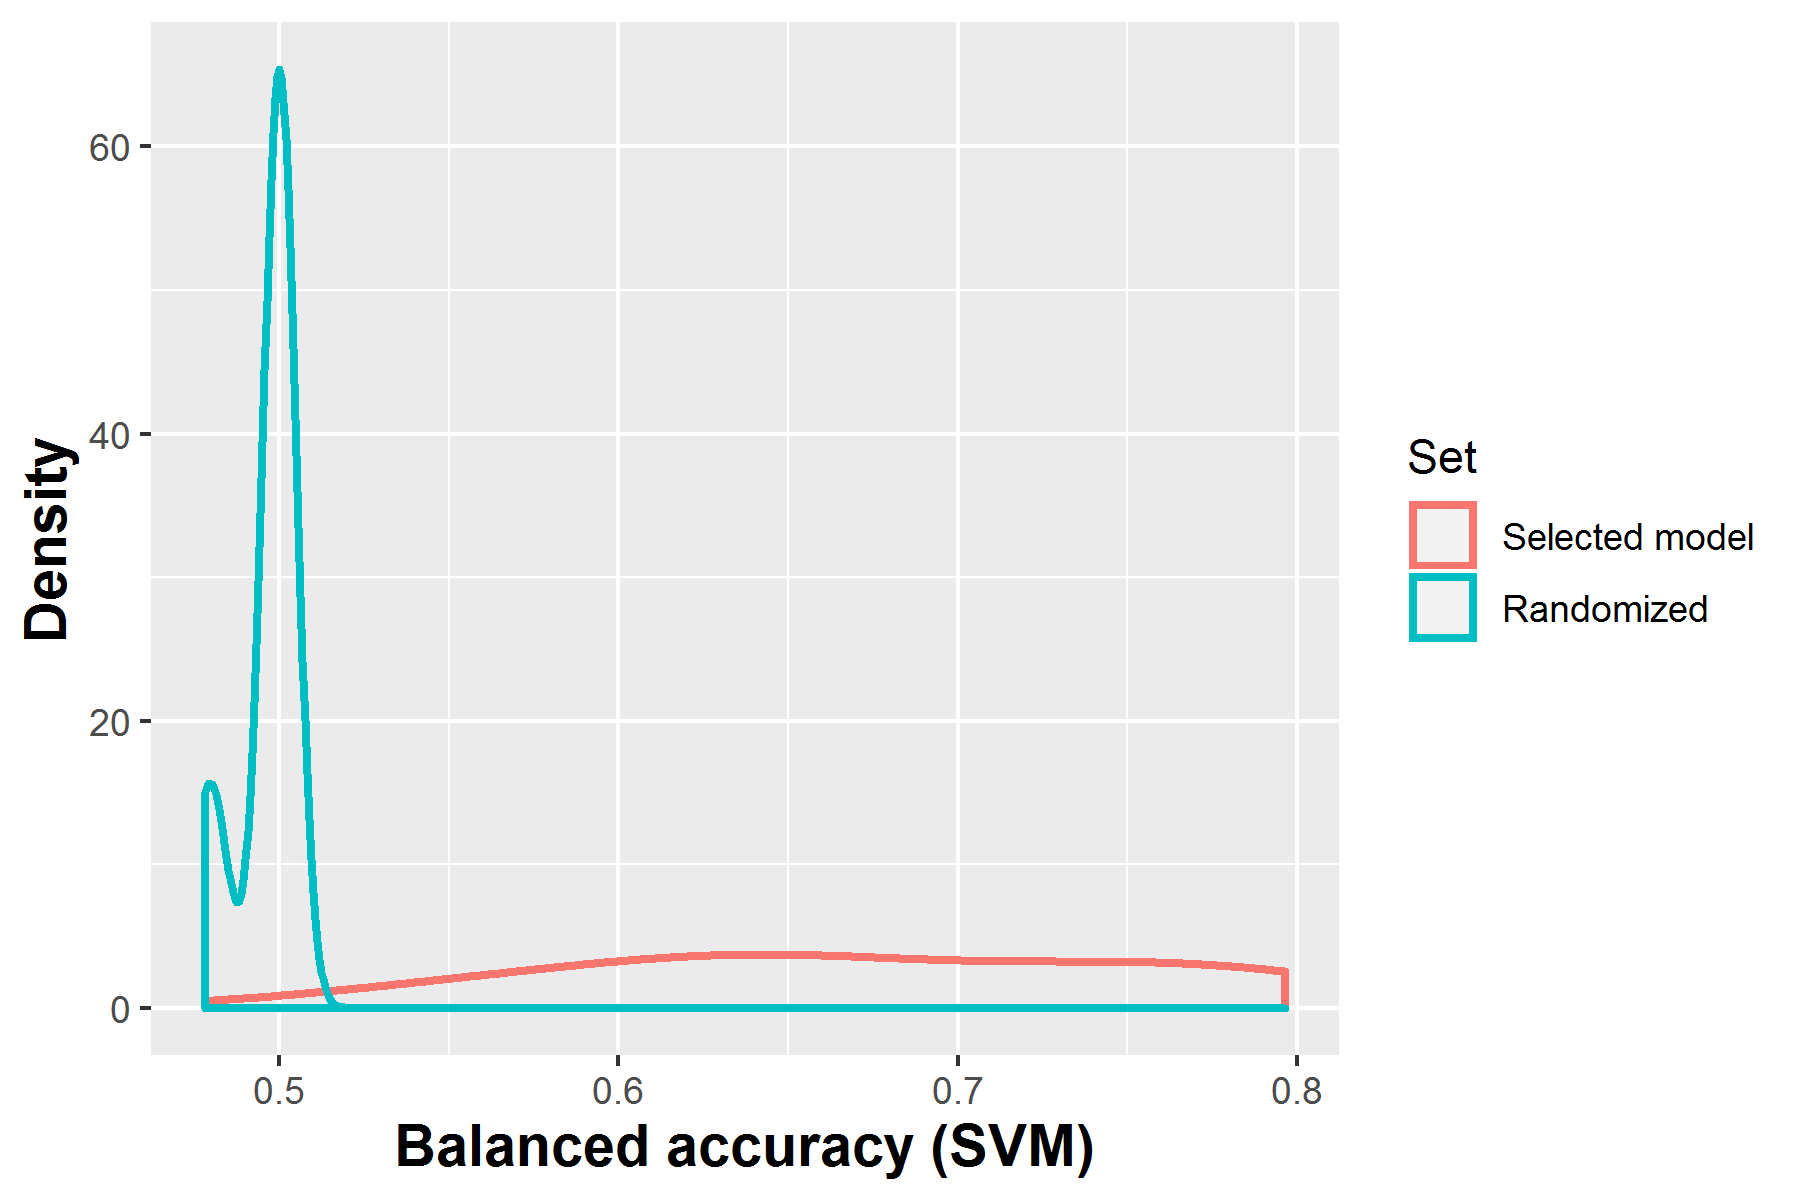

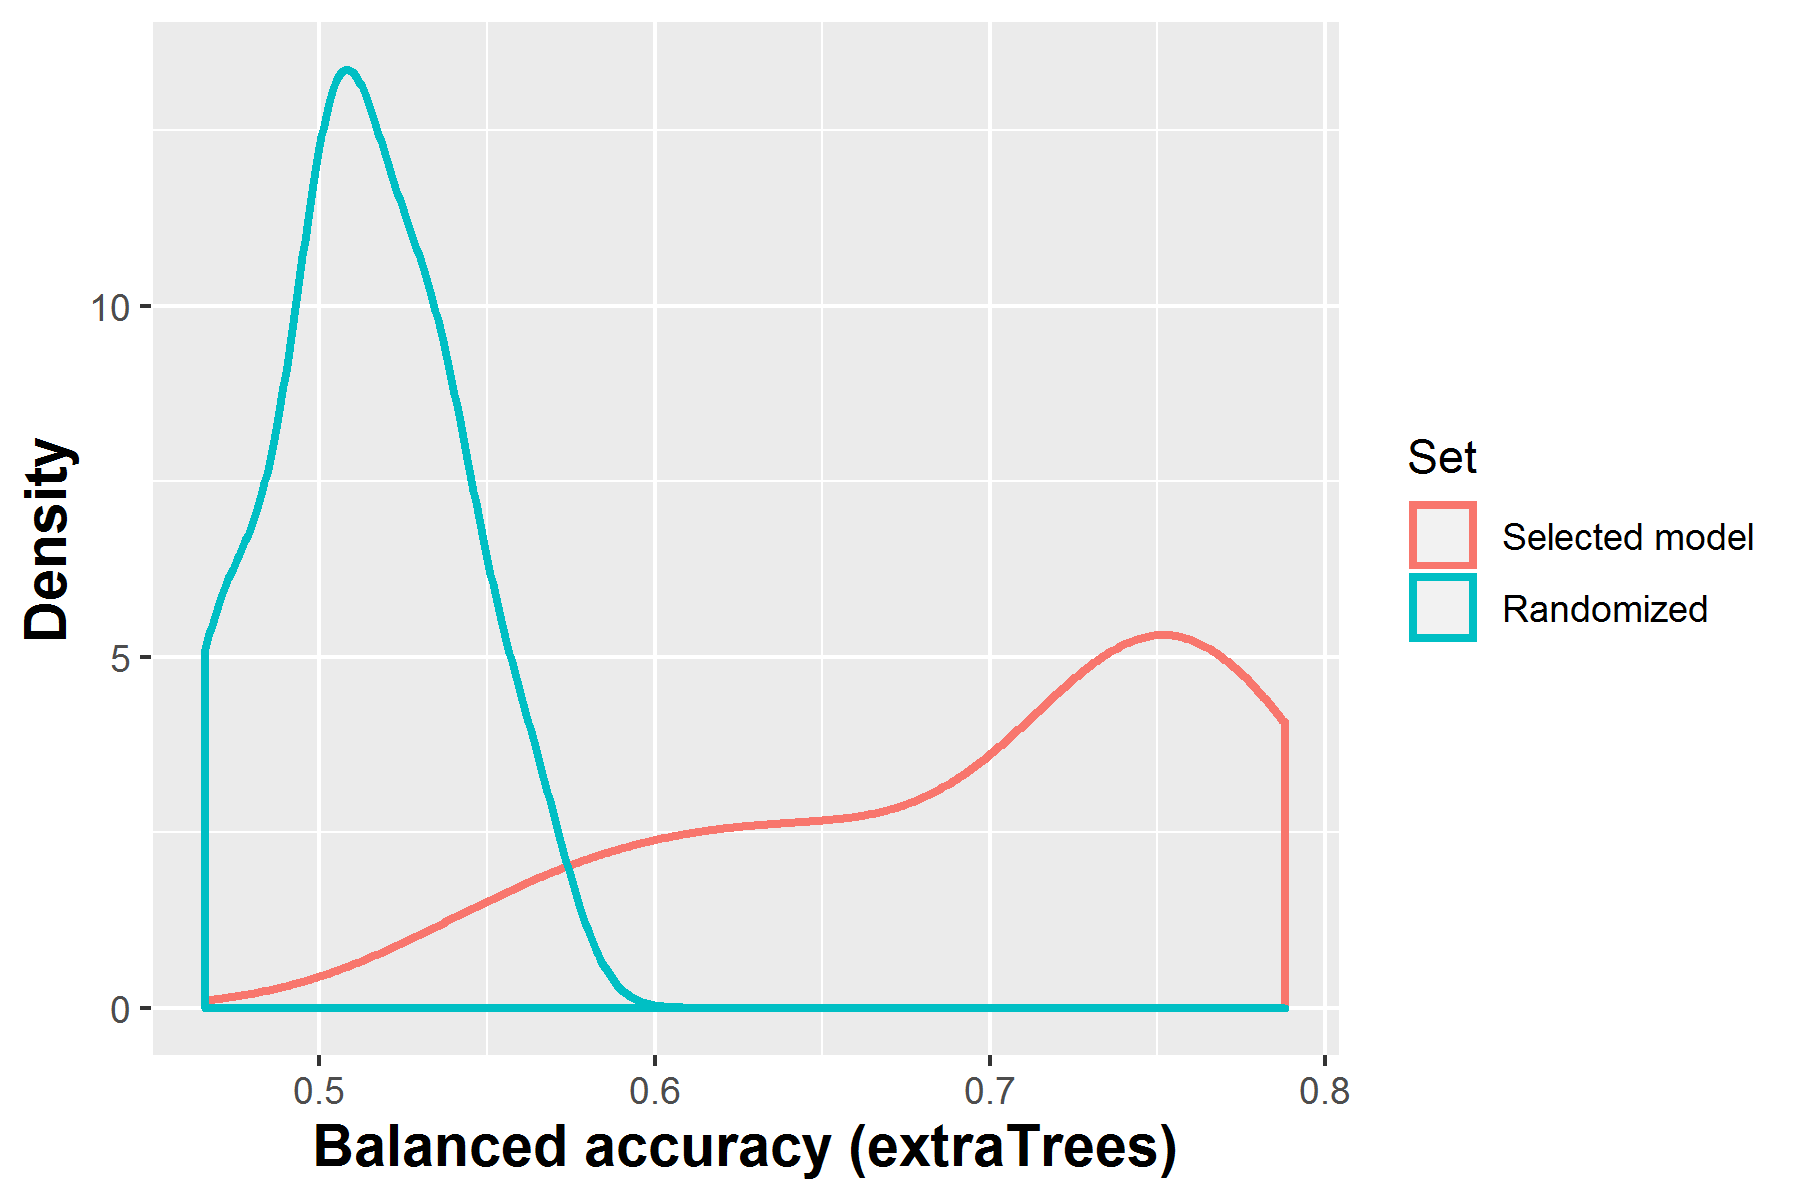

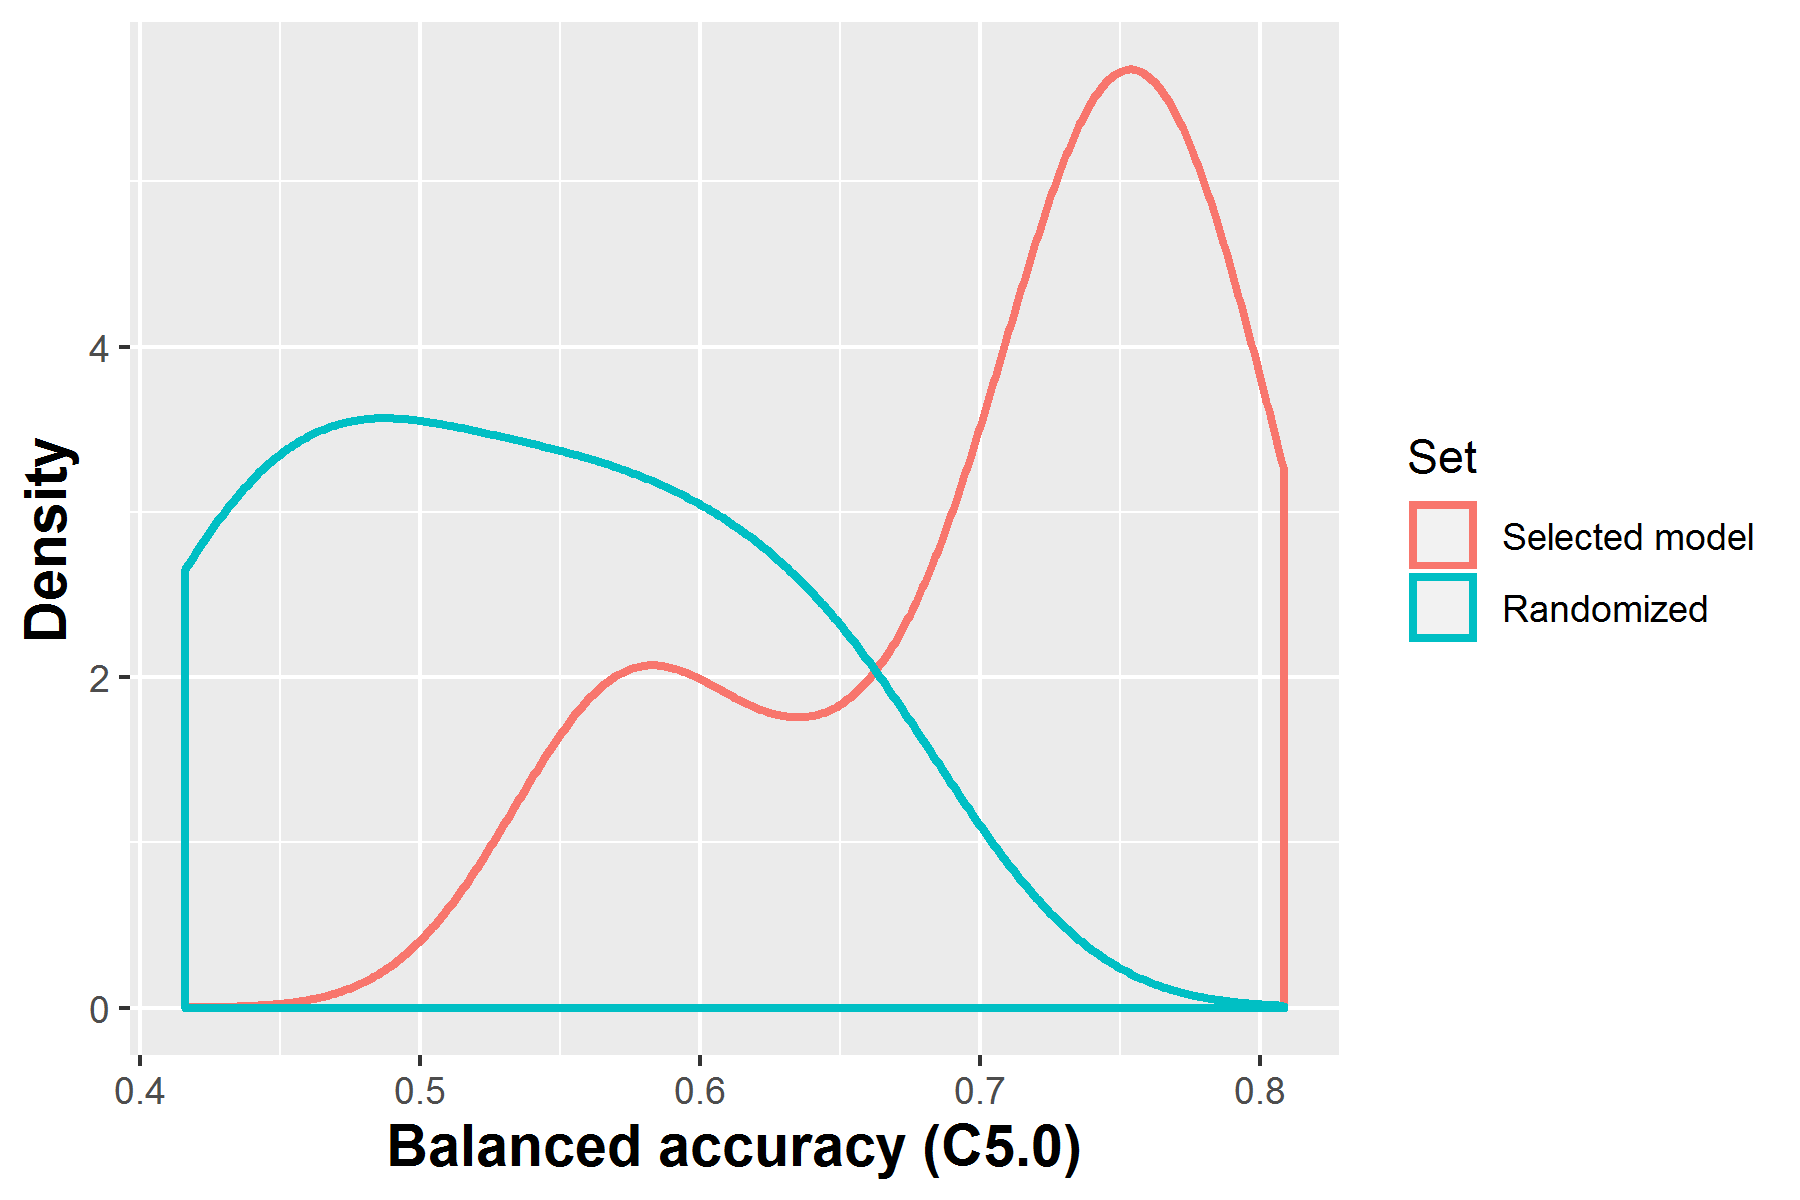

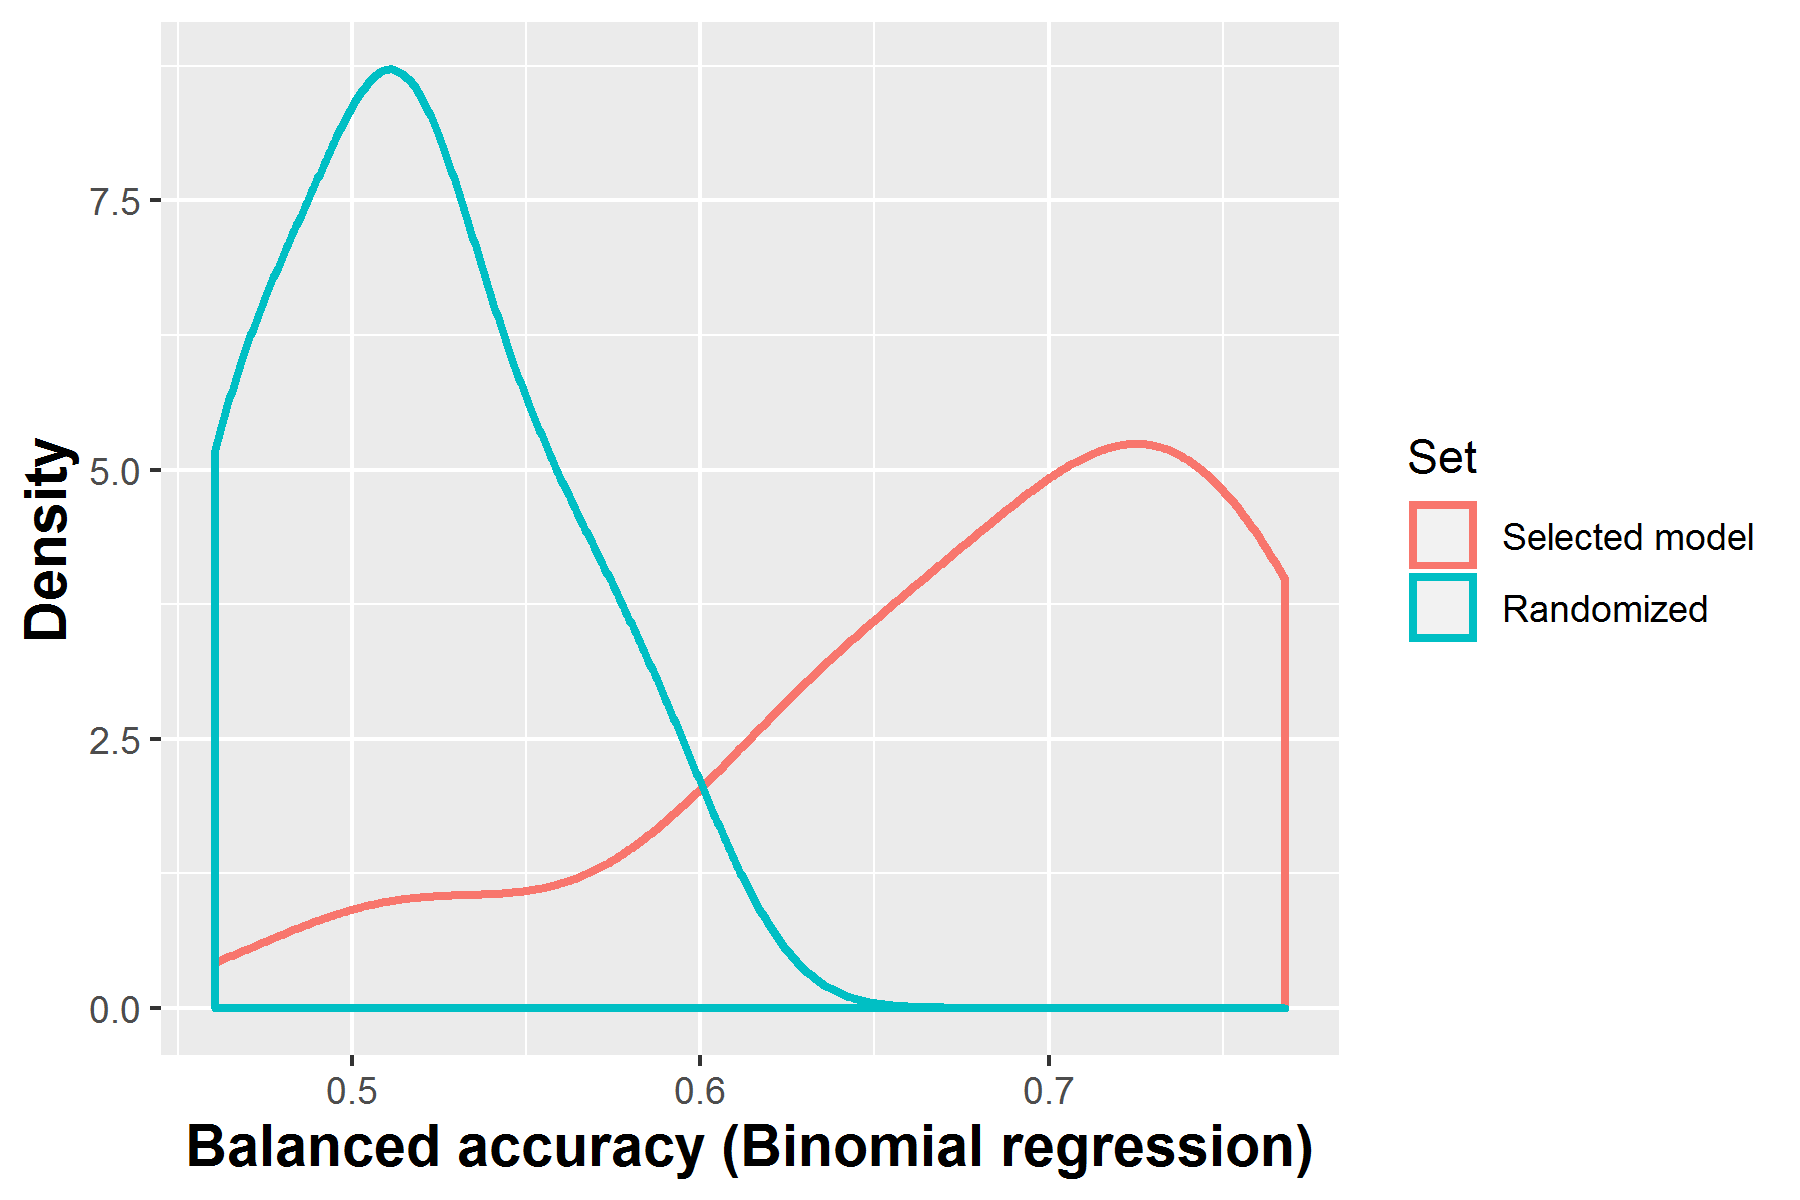

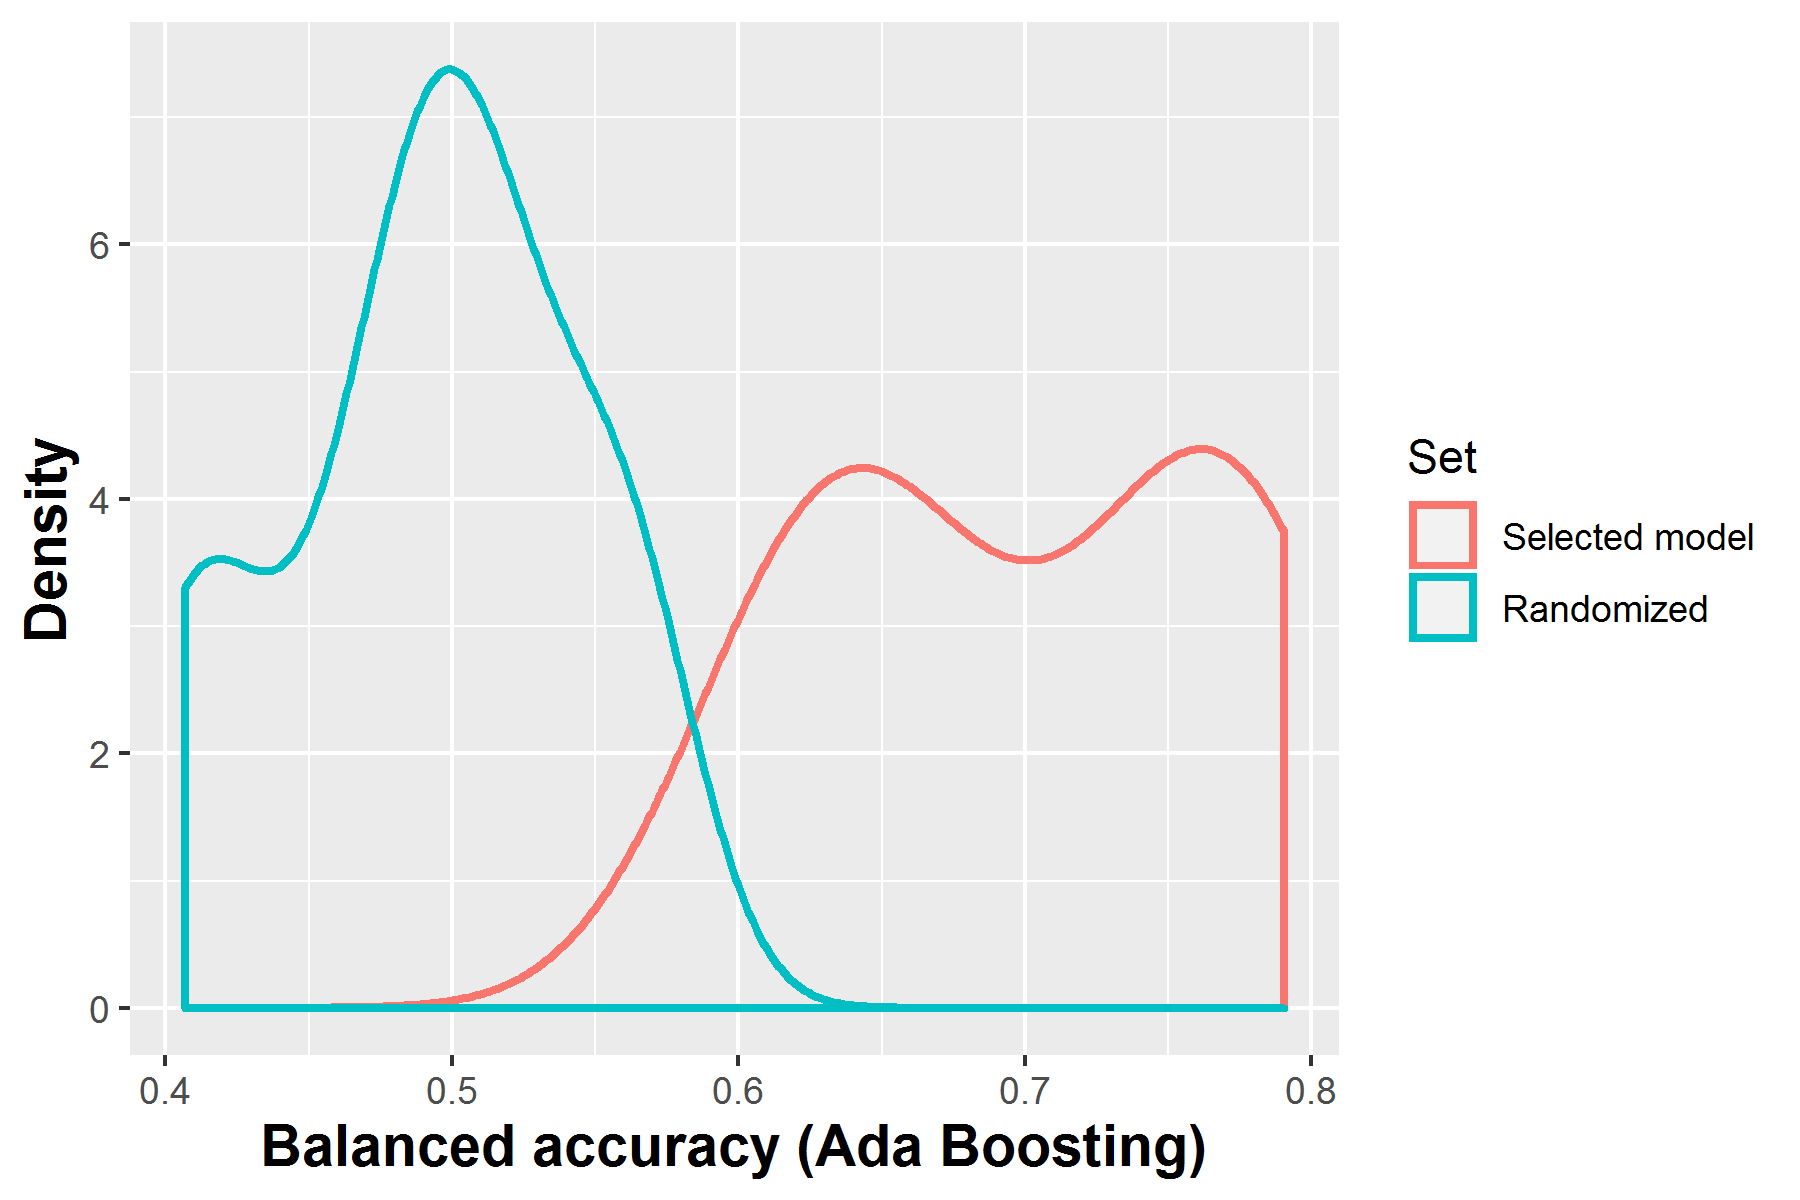

Supplement: Supplementary file 1 [file Figure S4.docx]
